# Supplementary material for: Enhanced photocatalytic activity of nanocrystalline N-doped ZnSb2O6: role of N doping, cation ordering, particle size and crystallinity
Source: Royal Society of Chemistry journal article supplement (doi:10.1039/c4ra12612b), 2014-01-01
Supplement: c4ra12612b1.pdf [file c4ra12612b1.pdf]

### Supplementary Materials

## Enhanced Photocatalytic activity of Nanocrystalline N - doped $\text{ZnSb}_2\text{O}_6$ : role of N doping, cation ordering, particle size and crystallinity

Nagarajan Arunkumar <sup>a</sup> and Rajagopalan Vijayaraghavan\* <sup>a</sup>

*Centre for Excellence in Nano Materials, Materials Chemistry Division, School of Advanced Sciences,  
VIT University, Vellore - 632 014, India.*

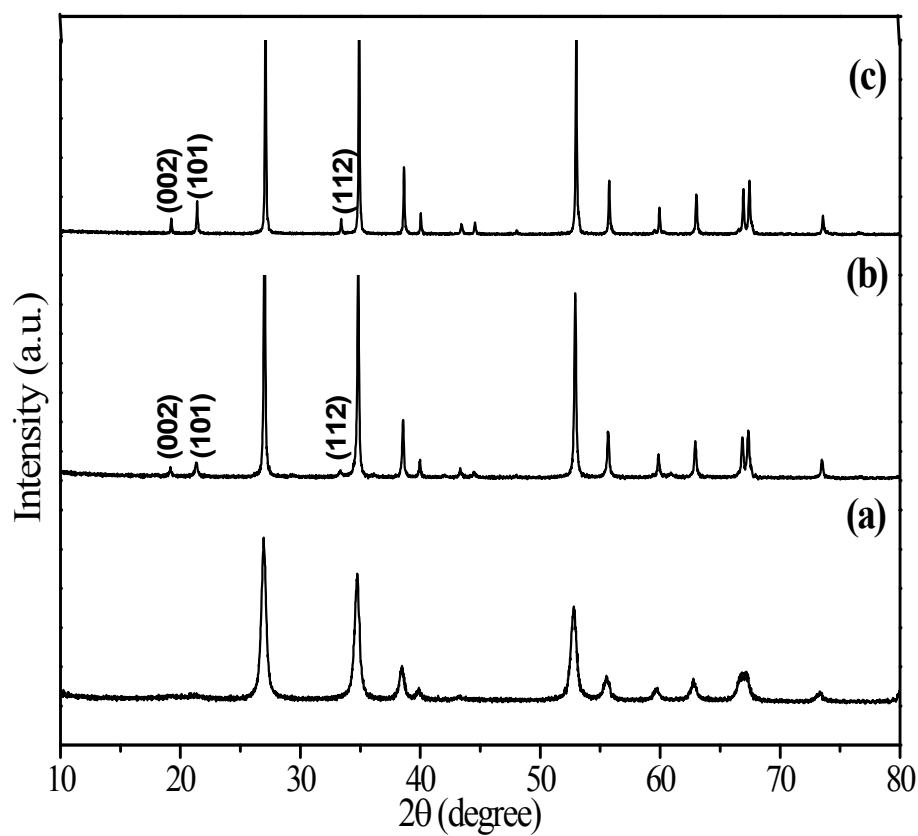

**Figure S1.** Nanocrystalline N – doped  $\text{ZnSb}_2\text{O}_6$  O/F = 1 (a) 600°C (b) 700°C and (c) 900°C/12h.

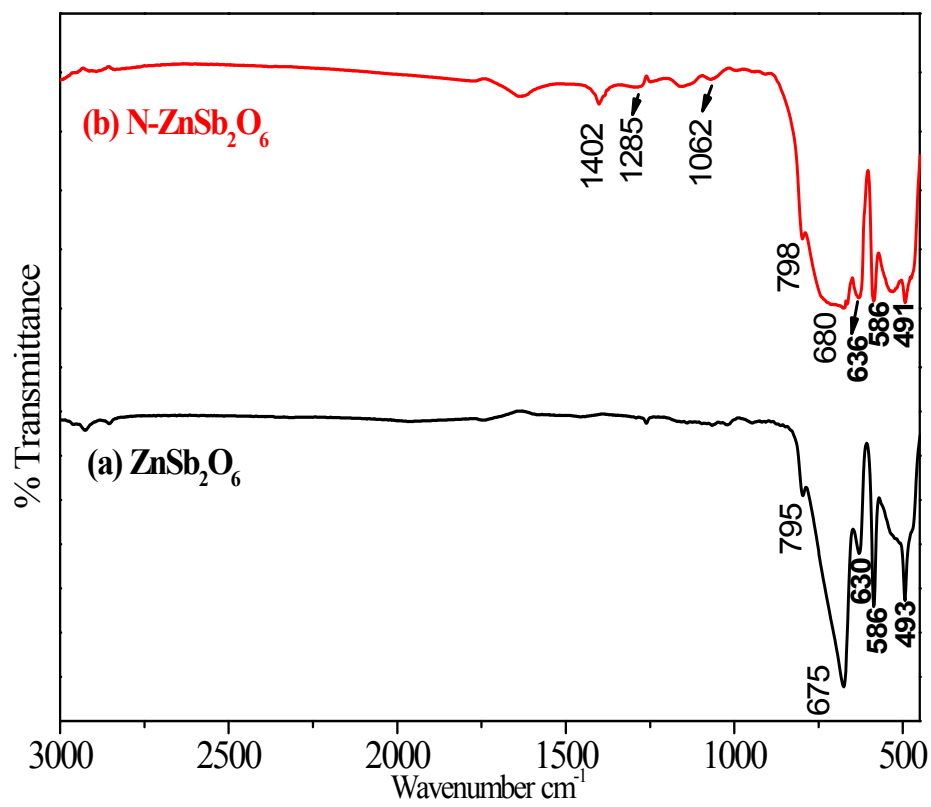

**Figure S2.** FTIR spectra of (a)  $\text{ZnSb}_2\text{O}_6$  (b) N - doped  $\text{ZnSb}_2\text{O}_6$

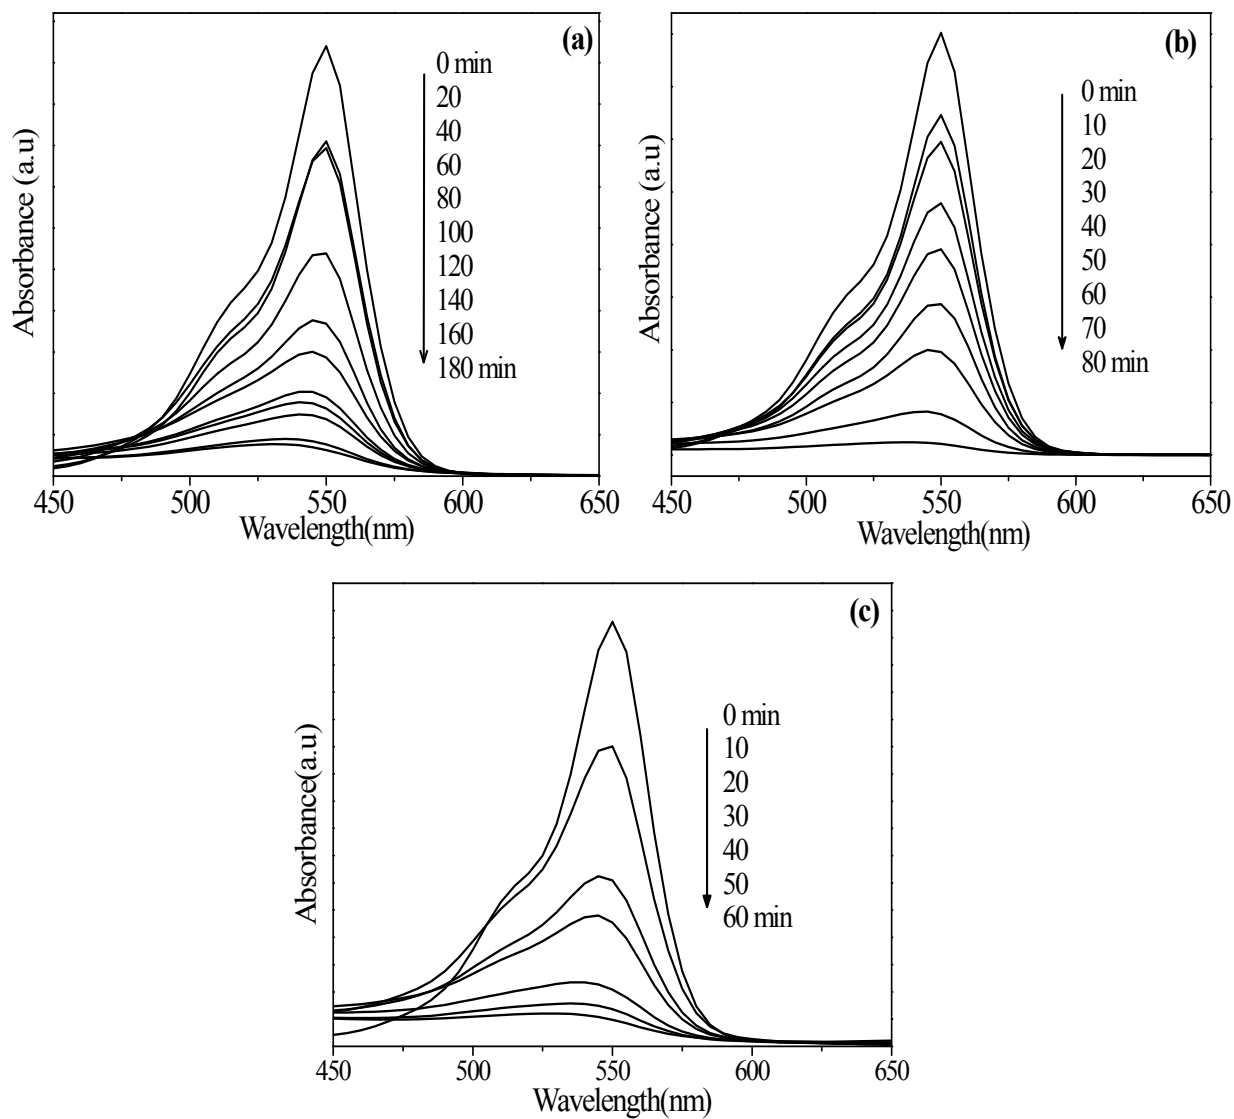

**Figure S3.** RhB photodegradation monitored by UV absorption spectra (a) ZnSb<sub>2</sub>O<sub>6</sub> (b) nanocrystalline disordered N -doped ZnSb<sub>2</sub>O<sub>6</sub> (c) ordered N - doped ZnSb<sub>2</sub>O<sub>6</sub>

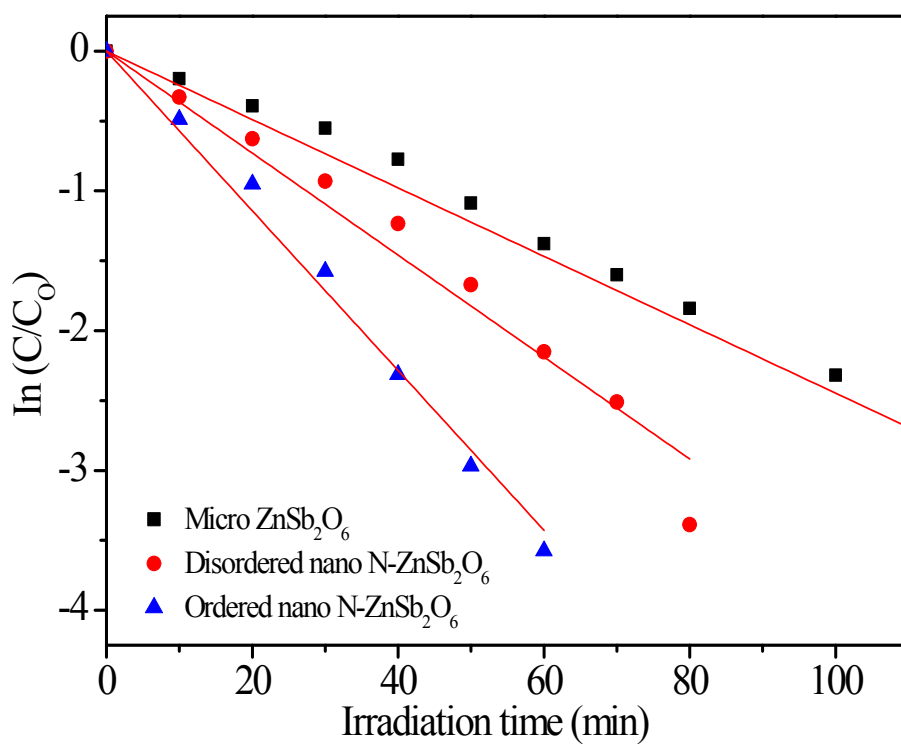

**Figure S4.** Plot of  $\ln C / C_0$  with time indicating first order kinetics

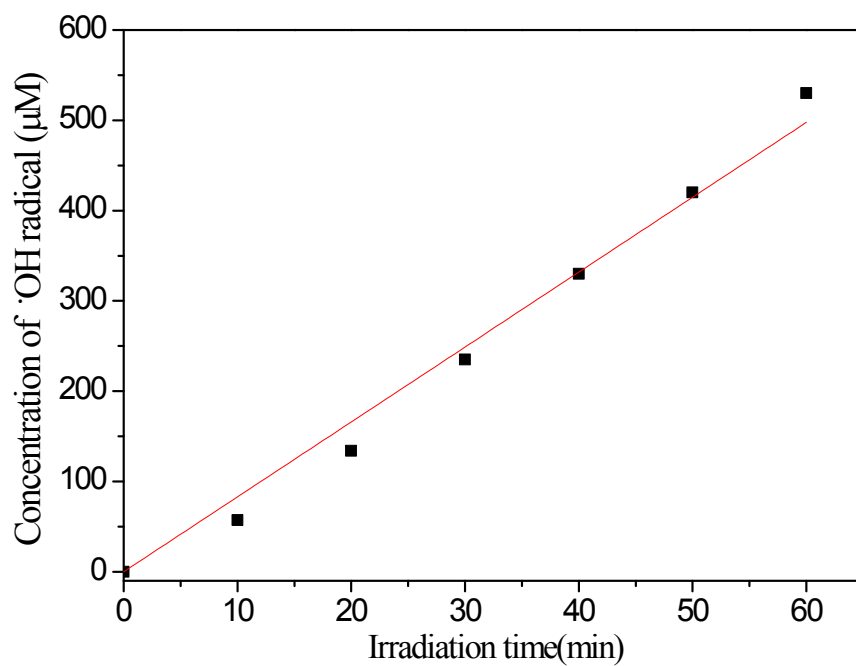

**Figure S5.** Concentration of ·OH radicals from ordered N-doped  $\text{ZnSb}_2\text{O}_6$  with irradiation time

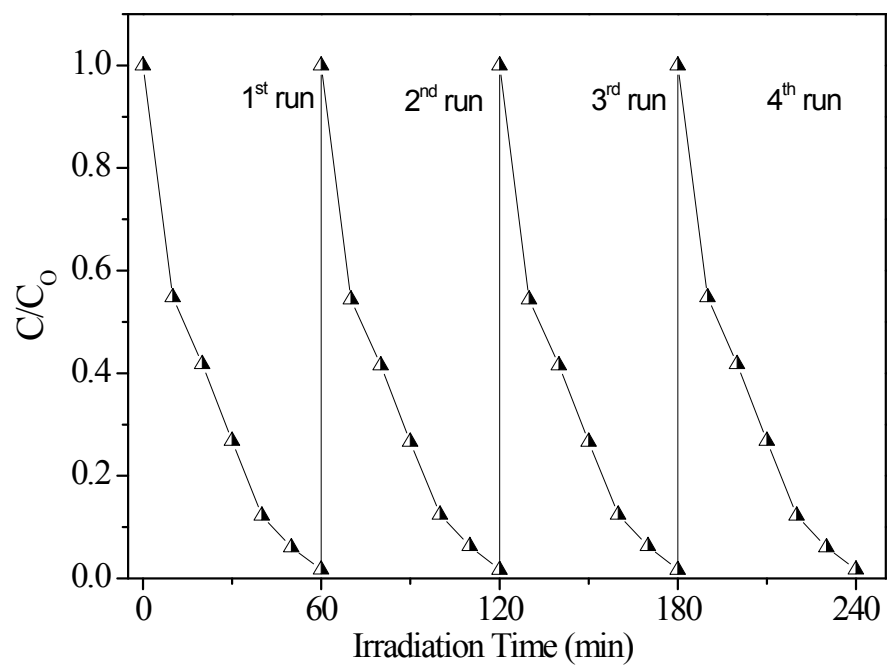

**Figure S6.** Recyclability of N – doped ZnSb<sub>2</sub>O<sub>6</sub> photocatalyst

**Table S1.** Crystallite size of nanocrystalline N - doped ZnSb<sub>2</sub>O<sub>6</sub>

| O/F ratio | Crystallite size<br>(nm) |
|-----------|--------------------------|
| #2        | 14                       |
| #1        | 15                       |
| #0.5      | 17                       |
| *600° C   | 26                       |
| *700° C   | 38                       |
| *900° C   | 72                       |

# As prepared, \* O/F = 1

**Table S2.** BET surface area of microcrystalline ZnSb<sub>2</sub>O<sub>6</sub> and nanocrystalline N- doped ZnSb<sub>2</sub>O<sub>6</sub>

| O/F ratio   | BET Surface area m <sup>2</sup> /g |
|-------------|------------------------------------|
| #2          | 34.6                               |
| #1          | 35.2                               |
| #0.5        | 31.9                               |
| *600° C     | 27.8                               |
| *700° C     | 24.7                               |
| Solid state | 2.3                                |

# As prepared, \* O/F=1





**Table S5.** Photocatalytic activity of microcrystalline ZnSb<sub>2</sub>O<sub>6</sub> and nanocrystalline N- doped ZnSb<sub>2</sub>O<sub>6</sub>

| Compound                                      | Degradation % | Complete degradation time (min) | k x10 <sup>-2</sup> min <sup>-1</sup> | •OH radical concentration (μM) |
|-----------------------------------------------|---------------|---------------------------------|---------------------------------------|--------------------------------|
| Ordered N-ZnSb <sub>2</sub> O <sub>6</sub>    | 99            | 60                              | 6.34                                  | 8.5                            |
| Disordered N-ZnSb <sub>2</sub> O <sub>6</sub> | 99            | 80                              | 4.93                                  | 6.8                            |
| ZnSb <sub>2</sub> O <sub>6</sub>              | 96            | 180                             | 1.72                                  | 2.9                            |
